# Supplementary material for: Advancing Evidence-Informed Policy: Outcomes of the Global Research Agenda on Knowledge Translation
Source: Research Square preprint supplement (doi:10.21203/rs.3.rs-8056056/v1), 2025-12-12
Supplement: Supplementary file 1 [file df2a1cb1a66cc6b8ce38f36a.docx]

## **Supplementary File 1. Members of the Advisory Committee**

Ahmed Mandil, Annette Boaz (chair), Daniel F Patiño-Lugo, Howard White, Jesse Uneke, Laurenz Mahlanza-Langer, Miriam Orcutt, Robert F Terry, Sally Green, Sarah C Charnaud, Somsak Chunharas (co-chair), Tarang Sharma, Tikki Pangestu; Temporary member: Amina Haouala

## **Supplementary File 2. List of 120 research areas**

| **#** | **Research domain** | **Research area** |
| --- | --- | --- |
| 1 | Research on KT/EIP interventions | Research on how to effectively communicate and disseminate complex scientific results between evidence generators and users [incl. a focus on advocacy coalitions/networking; narratives and arts; behavioral health research; targeting legislators and local policy-makers] |
| 2 | Research on KT/EIP interventions | Research on how to effectively promote and provide access to evidence (repositories, knowledge portals, dashboards, databases, and online tools) to increase policy-maker's engagement with research |
| 3 | Research on KT/EIP interventions | Research on the public understanding of evidence, including how to deal with disinformation, risk communication and the 'politicized' use of evidence |
| 4 | Research on KT/EIP interventions | Evaluating impacts and effectiveness of Journal Clubs and their components [e.g. on patient care] |
| 5 | Research on KT/EIP interventions | Determining the usefulness of KT products depending on their design (e.g., evidence briefs, deliberative dialogues, and other KT strategies) and the context they are applied in |
| 6 | Research on KT/EIP interventions | Evaluating impacts of: KT products' utility from different (health, political, economic, social) viewpoints |
| 7 | Research on KT/EIP interventions | Evaluating impacts of: innovative KT approaches for evidence dissemination |
| 8 | Research on KT/EIP interventions | Evaluating impacts of: policy advocates at the local level |
| 9 | Research on KT/EIP interventions | Research on how to effectively communicate complex scientific results between evidence generators and users, including on different communication and dissemination methods and strategies for improved research uptake |
| 10 | Research on KT/EIP interventions | Research on how to evaluate complex processes of influence (including research communication and KT) |
| 11 | Research on KT/EIP interventions | Whether and how the source of knowledge influences the perception of that knowledge and the willingness to use it |
| 12 | Research on KT/EIP interventions | Research on how to raise awareness for KT/EIP and on the end-users' KT/EIP experience [incl exploring social marketing approaches to facilitating implementation of KT/EIP and related institutional factors] |
| 13 | Research on KT/EIP interventions | Examining the role of media (in particular social media) in KT/EIP |
| 14 | Research on KT/EIP interventions | Assess the advantages and disadvantages of using different systems for grading evidence, and the perceptions of policy-makers and actors who do not have a research or health professional background. |
| 15 | Research on KT/EIP interventions | Research on the perspectives and experiences of the end-users of research evidence, including on whether knowledge products are understood by such target audiences |
| 16 | Research on KT/EIP interventions | What counts as ‘robust’ and ‘useful’/'policy-relevant' evidence and how to integrate different - sometimes discordant - forms of evidence (e.g., science advice; knowledge synthesis; surveillance data/modelling) relevant for decision-making while transparently reflecting on the validity of evidence used |
| 17 | Research on KT/EIP interventions | Better understanding the type of research/evidence needed by end-users, incl qualitative research and tacit evidence, in different contexts; and potential mismatches between researcher-driven vs decision-maker's driven interventions [e.g. legislatures in Europe] |
| 18 | Research on KT/EIP interventions | How to customize KT mechanisms, interventions, products, and formats to different audiences/policy-makers with different levels of expertise to maximize success? |
| 19 | Research on KT/EIP interventions | How to develop and implement research agendas relevant for policy needs, including emphasizing KT aspects in all relevant academic areas |
| 20 | Research on KT/EIP interventions | Investigating how and when cost-effectiveness analysis (CEA) can be used for decision-making |
| 21 | Research on KT/EIP interventions | Research on costs-effectiveness of different KT interventions (e.g., library services, dissemination approaches, remote knowledge brokers (rKB), KT support personnel, collaborations, forums, protocols, consultations) to different groups in different contexts, and in which doses |
| 22 | Research on KT/EIP interventions | Better understand and develop KT intervention mechanisms for behavioral change |
| 23 | Research on KT/EIP interventions | Research on knowledge exchange mechanisms that are led by knowledge users, policy, and not by researchers |
| 24 | Research on KT/EIP interventions | Systematically synthesizing mechanisms for evidence use |
| 25 | Research on KT/EIP interventions | Understanding in depth the process of evidence use, including identifying its intended recipients and users, and exploring decision-makers’ engagement with evidence (e.g., through anthropological and qualitative studies examining the whole process) |
| 26 | Research on KT/EIP interventions | Research on how to transfer KT experiences from one jurisdiction/context/population/country to another |
| 27 | Research on KT/EIP interventions | Research on KT interventions targeting patients and the general public |
| 28 | Research on KT/EIP interventions | Research on successful KT interventions promoting research uptake while considering practical implications |
| 29 | Research on KT/EIP interventions | Examine best practices on how to meaningfully and effectively identify and engage different actors in KT research and processes (e.g., evidence end users, target populations, underrepresented groups, families, communities, citizens, patients, and users of health interventions/services) |
| 30 | Research on KT/EIP interventions | Better understanding the formal and informal interactions between evidence generators/scientific community and evidence users (from bureaucratic leaders to carer, patients, the public), and develop methods how to strengthen these linkages |
| 31 | Research on KT/EIP interventions | Exploring the role and influence of different actors (e.g. researchers, intermediaries, knowledge users, citizens, patients, and funders) for collaborative approaches in research production [promoting democratization of evidence] |
| 32 | Research on KT/EIP interventions | How to evaluate E2P engagement forums (e.g. virtual policy dialogues or international meetings/conferences) to assess effectiveness, process and outcomes, while using sector development indicators and identifying required modifications for virtual formats [e.g. related to deliberative dialogues in Africa; rural primary health care] |
| 33 | Research on KT/EIP interventions | Research on the role and strategies of knowledge brokers to better understand when and how to approach national and regional decision-makers [in LMIC] |
| 34 | Research on KT/EIP interventions | Better understanding linkages and exchange mechanisms to promote evidence use among specific target groups (e.g. legislators) |
| 35 | Research on KT/EIP interventions | How does engagement and leadership of decision-makers foster KT/EIP? |
| 36 | Research on KT/EIP interventions | Research on how to systematically synthesize evidence from stakeholder engagement |
| 37 | Research on KT/EIP interventions | Understanding, developing/adapting, and evaluating strategies and methods to enhance KT/EIP capacity and skills in different contexts [incl public health programs in LMICs], and understanding the effectiveness of training to influence and sustain (i) knowledge and skills, (ii) KT/EIP behaviors in policy-makers [short- and long-term effectiveness of selective training of certain staff versus broad capacity development on sustainable adoption of EIDM and the distribution of knowledge in public health organizations] |
| 38 | Research on KT/EIP interventions | Evaluating the impacts of KT interventions/strategies [e.g. trainings, evidence rounds] on building individual and organizational capacity to use research, and how these impacts differ by training duration |
| 39 | Research on KT/EIP interventions | Identifying key KT/EIP skills and knowledge, and how to design and scale-up appropriate learning, skill development and capacity-building approaches (such as mentoring and coaching) for different evidence ecosystem actors, at all levels and career stages, including at leadership level |
| 40 | Research on KT/EIP interventions | Understanding how to build KT/EIP careers within and across organizations |
| 41 | Research on KT/EIP interventions | Examining longer EIDM capacity building interventions to allow for a longer period of evaluation and re-evaluation with progressive support and mentoring and the use of an implementation framework which would aid future comparability |
| 42 | Research on KT/EIP interventions | Testing approaches to building and sustaining local capacity for conducting KT research |
| 43 | Research on KT/EIP interventions | Understanding the current status of the use of KT interventions in medical education, continued learning programs, and workshops in the field of health |
| 44 | Research on KT/EIP interventions | KT institutionalization: Research on organizational strategies to turn evidence use into an institutional routine, including assessing organizational readiness and strategies, discussing the hosting and sustainability of evidence-support units, and overall increase of evidence uptake across the institution at the local, national and global level |
| 45 | Research on KT/EIP interventions | Evaluating the effectiveness of different Knowledge Brokers activities, trainings, and characteristics in different contexts within different types of 'evidence user' organizations (e.g., ministries, schools, donor agencies, etc.) across sectors |
| 46 | Research on KT/EIP interventions | How to ensure the long-term sustainability of KT interventions beyond the implementation or research period [especially in LMICs] |
| 47 | Research on KT/EIP interventions | Developing approaches and frameworks to effectively embed evidence uptake at the organizational level |
| 48 | Research on KT/EIP interventions | How to facilitate/spread/institutionalize the establishment of Scientific Committees |
| 49 | Research on KT/EIP interventions | How to incorporate KT approaches or perspectives in the everyday research of scientists |
| 50 | Research on KT/EIP interventions | Developing effective strategies for scaling evidence take-up, learning from previous experiences of intervention scaling-up and practice diffusion, incl integrating experiential learning into practice |
| 51 | Research on KT/EIP interventions | Research on methods to promote the use of the research findings by the three actors of the health system (government, providers and patients) |
| 52 | Research on KT/EIP interventions | Evaluating the implementation and outcomes/impacts of KT interventions (including of complex, multi-component interventions) on policy, practice, and overall development outcomes; targeting different end-users and levels (individual, organizational, and system levels) |
| 53 | Research on KT/EIP interventions | Conducting rigorous counterfactual-based trials to measure the impact of KT/EIP interventions and research implementation strategies, to identify the most effective ones |
| 54 | Research on KT/EIP interventions | Examining the effectiveness of (integrated) KT interventions, and developing related tools |
| 55 | Research on KT/EIP interventions | Evaluating the impacts of KT interventions [to inform school reform efforts; on health outcomes and systems] |
| 56 | Research on KT/EIP interventions | Evaluating the intermediate and longer-term impacts of KT interventions, including the sustainability of behavior change and policy adoption |
| 57 | Research on KT/EIP interventions | Examining the effectiveness of implementing policy arising from the utilization of KT theories |
| 58 | Research on KT/EIP interventions | Examining the effectiveness of integrated KT versus end-of-grant translation |
| 59 | Research on barriers, facilitators, and opportunities for KT/EIP | Understanding barriers and facilitators and identifying solutions to effectively implementing KT interventions and processes [in particular in LMICs], targeting different audiences |
| 60 | Research on barriers, facilitators, and opportunities for KT/EIP | Examining what psychological and behavioral change factors affect individual-level take-up of high-quality evidence ("Why are we so reluctant to change?") |
| 61 | Research on barriers, facilitators, and opportunities for KT/EIP | Investigating the factors that affect the operation and outcomes of knowledge brokers and KT Platforms, including their knowledge on KT/EIP research |
| 62 | Research on barriers, facilitators, and opportunities for KT/EIP | Identifying and examining individual and organizational characteristics that influence KT/EIP and their scaling-up |
| 63 | Research on barriers, facilitators, and opportunities for KT/EIP | Role of incentives in promoting KT and evidence uptake and timely application |
| 64 | Research on barriers, facilitators, and opportunities for KT/EIP | Examining language use and how to overcome language barriers in KT |
| 65 | Research on barriers, facilitators, and opportunities for KT/EIP | Examining approaches to generate resources for KT research and uptake |
| 66 | Research on barriers, facilitators, and opportunities for KT/EIP | How to effectively plan, tailor, and implement KT strategies in different contexts (e.g., different cultures, different groups (race, age), LMICs vs. HICs, institutions (hospitals, nursing homes), complex environments, politically or financially fragile contexts, conflict-affected areas, or during disease outbreaks |
| 67 | Research on barriers, facilitators, and opportunities for KT/EIP | Examining the role of contextual factors (e.g., structural/political/economic factors/beneficiaries factors/ vested interests, etc.) in implementing KT/EIP initiatives at different levels, and how these factors can be effectively addressed [including political economy] |
| 68 | Research on barriers, facilitators, and opportunities for KT/EIP | Roles of different actors and how they influence KT practices (e.g., funders, leaders, knowledge-brokers, policy-makers, civil society, politicians, street-level bureaucrats) |
| 69 | Research on barriers, facilitators, and opportunities for KT/EIP | Research on the decolonization of knowledge, methods and measures (tailoring to local cultures) |
| 70 | Research on barriers, facilitators, and opportunities for KT/EIP | Investigating whether or how the characteristics of rapid reviews facilitate their use within complex policy processes |
| 71 | Research on barriers, facilitators, and opportunities for KT/EIP | Research comparing evidence-to-policy systems across different countries and settings |
| 72 | Research on barriers, facilitators, and opportunities for KT/EIP | How can gender, equity and intersectionality be considered more in KT and KT research, especially regarding affected communities and countries? |
| 73 | Research on barriers, facilitators, and opportunities for KT/EIP | Examining when, and for what issues and contexts living evidence can be useful for policy-makers, and how to enable wider, more equitable access to living evidence syntheses globally. |
| 74 | Research on KT/EIP methods, standards, and measurements | Conduct interdisciplinary and mixed-methods KT research |
| 75 | Research on KT/EIP methods, standards, and measurements | Developing methods aimed at improving the transparency of results of evidence-based products for knowledge users, including certainty of the results and the methodology used, incl developing a clear outline for the validation of evidence |
| 76 | Research on KT/EIP methods, standards, and measurements | Examining differences in KT approaches in public health systems vs clinical practice, incl how to develop policy options for health systems |
| 77 | Research on KT/EIP methods, standards, and measurements | Improving overall research development process to meet KT needs, including conducting interdisciplinary KT research, addressing biases in scientific publication processes, developing evidence-based approaches for balancing power dynamics to facilitate equitable, reciprocal exchange, managing conflicts of interest, assessing evidence quality, and considering both quantitative and qualitative evidence |
| 78 | Research on KT/EIP methods, standards, and measurements | Research on innovative KT approaches [e.g., how hackathons can contribute to future innovative research) |
| 79 | Research on KT/EIP methods, standards, and measurements | Developing a measurement tool to assess the methodological quality of Evidence Briefs for Policy |
| 80 | Research on KT/EIP methods, standards, and measurements | Developing evidence-based approaches for balancing power dynamics to facilitate equitable, reciprocal exchange |
| 81 | Research on KT/EIP methods, standards, and measurements | Developing strategies and interventions to overcome conflicts of interest (industry, dissenting scientists) which impede effective KT |
| 82 | Research on KT/EIP methods, standards, and measurements | Establishing methods to develop time sensitive evidence-based products, accurately conveying evidence validity, without losing credibility, and considering tacit knowledge and implementation evidence |
| 83 | Research on KT/EIP methods, standards, and measurements | Finding ways to simplify the identification of barriers and facilitators of KT |
| 84 | Research on KT/EIP methods, standards, and measurements | How to establish mechanisms for local KT knowledge to feed into global knowledge |
| 85 | Research on KT/EIP methods, standards, and measurements | Implications and effectiveness of defining health technology assessments (HTA) as a knowledge mobilization process, considering ethical, social and political issues, as well as the involvement of actors, patients, and the public through the whole knowledge production and dissemination process. |
| 86 | Research on KT/EIP methods, standards, and measurements | KT research led by Indigenous communities |
| 87 | Research on KT/EIP methods, standards, and measurements | Research on effective facilitation methods for consensus building |
| 88 | Research on KT/EIP methods, standards, and measurements | Using existing community-based data in an integrated way as KT research. |
| 89 | Research on KT/EIP methods, standards, and measurements | Undertaking country case studies to explore mechanisms and models where evidence and policy can successfully intersect. |
| 90 | Research on KT/EIP methods, standards, and measurements | Developing clear pathways or avenues to swiftly move evidence to practice; identifying the differences between formal and informal pathways and how these can be leveraged |
| 91 | Research on KT/EIP methods, standards, and measurements | Developing cost-effective approaches to enhance the quality of KT products |
| 92 | Research on KT/EIP methods, standards, and measurements | Establishing and evaluating possible feedback mechanisms when applying/contextualizing global health systems guidance, with the aim to improve guidance development and research priority-setting processes |
| 93 | Research on KT/EIP methods, standards, and measurements | Examine different approaches to improve the use of climate information to support medium-term (5–40 years) policies and planning in sub-Saharan Africa. |
| 94 | Research on KT/EIP methods, standards, and measurements | Investigating how to hold decision-makers accountable to evidence |
| 95 | Research on KT/EIP methods, standards, and measurements | More research is required to understand how (GIS) mapping software and maps can support evidence-based decision making in public health program planning and in different public health contexts, and how to minimize barriers to innovation and adoption of maps/mapping in decision-making. |
| 96 | Research on KT/EIP methods, standards, and measurements | Examining the role of (generative) AI in KT methods and interventions, exploring potential applications, limitations and risks |
| 97 | Research on KT/EIP methods, standards, and measurements | Use of technology to support KT |
| 98 | Research on KT/EIP methods, standards, and measurements | Conceptualizing and standardizing KT terminologies, concepts, products, methods, typologies - globally and across sectors, including identification of factors that promote the uptake of standardization |
| 99 | Research on KT/EIP methods, standards, and measurements | Developing indicators and metrics to monitor and evaluate KT initiatives |
| 100 | Research on KT/EIP methods, standards, and measurements | Tools and methods for monitoring and evaluation of KT initiatives (for outcome, impact, effectiveness, behavior change, quantifying uptake, at individual/organizational/policy levels) based on standardized metrics |
| 101 | Research on KT/EIP methods, standards, and measurements | Developing a tool that accurately identifies staff who demonstrate potential to become an innovator or early adopter of evidence-informed decision-making behavior, and focus early training initiatives on this group. |
| 102 | Research on KT/EIP theories and frameworks | Develop KT frameworks that consider non-human actors like generative AI, and align those with open-source, digital public goods, and other modes of knowledge networks |
| 103 | Research on KT/EIP theories and frameworks | Developing a capacity-building framework for KT that links existing attempts to innovate capacity-building to increase research use |
| 104 | Research on KT/EIP theories and frameworks | Exploring how different conceptions of 'wellbeing' shape the nature and role of evidence in policy. |
| 105 | Research on KT/EIP theories and frameworks | Avoid de novo frameworks: Developing KT theoretical frameworks that consolidate existing frameworks in an economic and fit-for-purpose way [e.g., implementation theories and health behavior theories] |
| 106 | Research on KT/EIP theories and frameworks | Developing – or adapting existing – KT/EIP frameworks that take into account contextual diversity (e.g., organizations, individuals, communities) |
| 107 | Research on KT/EIP theories and frameworks | Research on the usefulness of KT theory in KT/EIP |
| 108 | Research on KT/EIP theories and frameworks | Examining epistemic traditions of KT-related models and theories |
| 109 | Research on KT/EIP theories and frameworks | Developing effective, sustainable, full-spectrum, demand-led conceptual frameworks, taxonomies of interventions and outcomes, and theoretical models for effective KT [in public health emergencies] to capture impacts and the sustainability of behavior changes from KT interventions |
| 110 | Research on KT/EIP theories and frameworks | Developing KT theoretical frameworks that consolidate existing frameworks in an economic and fit-for-purpose way. |
| 111 | Research on KT/EIP theories and frameworks | Developing theoretical and conceptual frameworks to guide the institutionalization process of EIDM |
| 112 | Research on KT/EIP theories and frameworks | Developing theories of change for scientific research on health and beyond health |
| 113 | Research on KT/EIP theories and frameworks | Exploring the relationship, alignment and mutual learning between KT and other sciences (policy science, basic science, clinical research, science diplomacy) |
| 114 | Research on KT/EIP theories and frameworks | Developing a framework to regularly appraise the information uploaded in online clearinghouses for health policy and system information in low-resource settings. (Clearinghouses include health policies, strategies, plans, rapid response summaries, evidence briefs for policy and policy dialogue reports.) |
| 115 | Research on KT/EIP theories and frameworks | How to identify/develop and validate appropriate KT framework(s) and tool(s) and keep them "living" |
| 116 | Cross-cutting domain: Diversity, Equity, Inclusion* | Research on intersectionality, critical race theory, and complementarity of equity interventions and KT interventions, to better understand inequities in research use |
| 117 | Cross-cutting domain: Diversity, Equity, Inclusion* | How can access to research funding, publications, and acceptance into journals be made more equitably for individuals in LMICs and Indigenous communities? How to make sure that structurally marginalized voices are heard in KT research? |
| 118 | Cross-cutting domain: Diversity, Equity, Inclusion* | How can KT interventions be designed with particular consideration of Equity, Diversity, and Inclusion as well as intersectionality (interventions that are respectful and where local/underserved communities can participate) |
| 119 | Cross-cutting domain: Diversity, Equity, Inclusion* | How to equitably engage persons with lived experience in knowledge generation and translation |
| 120 | Cross-cutting domain: Diversity, Equity, Inclusion* | Incorporating health inequality impact into the economic evaluation of systematic reviews addressing a question(s) about health intervention. |

Note: These 120 draft research areas formed the foundation for the consultative process and were specifically used to inform the first consultation held in March 2024. The list represents a synthesis of three key sources: the PACE evidence map, findings from the Review on past KT research prioritization exercises, and results from the online survey.

* This cross-cutting domain was later integrated into the remaining domains.

## **Supplementary File 3. First virtual consultation**

**Breakout Room 1: Research on KT/EIP Interventions I**

**(BR= breakout rooms)**

**BR1.A. Key findings**

- Research areas could still be valid even if a lot of research already exists in that area (there is a need for quality not quantity of studies).
- There is a need to differentiate between knowledge for policy and knowledge for the public. It would be useful to understand which priorities on the list focus on KT for society versus KT for decision-makers – audience is key.
- Evaluating institutional mechanisms is a gap (though covered by a different breakout room).
- There is some divergence on grading evidence and using GRADE for policy-makers.
- Communicating certainty to decision-makers remains an important gap, including to those that have little interest in evidence.
- Some reviews are already underway, such as the Cochrane Literature review, that might address some of the gaps and identify evidence that is already available.

**Breakout Room 2: Research on KT/EIP Interventions II**

**BR2.A. Key findings**

- Most of the priorities were considered to be good areas to work on, although participants only contributed to areas they felt comfortable addressing.
- Participants provided specific feedback on some draft research domains:
  *Exploring the role and influence of different actors for collaborative approaches in research production* 🡪 This could be split up into the identification/role of different actors and the use of different methods to co-produce research.
- *Research on KT interventions targeting patients and the general public* 🡪 This could be refined further and/or combined with another research area (currently too broad).
- There should be an additional research area on combatting misinformation and outdated scientific information while promoting digital literacy and trust during times when scientific discoveries are changing (e.g., during COVID).
- There is a need to support democratization and co-creation of evidence, and to understand how to incorporate KT into everyday decision-making.

**Breakout Room 3: Research on barriers, facilitators, opportunities, and context for KT/EIP**

**BR3.A. Key findings**

- The group felt generally accepting of the proposed list.
- It is crucial to discuss the language barrier as it gets difficult for policy-makers who do not understand or communicate in English to get involved in KT.
- There is a lack of available, context-specific local knowledge due to, e.g., knowledge not being in a publish-able language or not having a platform for dissemination.
- Gender equity and intersectionality need to be part of each research question, but further work is needed to refine how this is implemented.
  - - - Needs addressing: the role of the beneficiaries and whether they are being targeted enough or included in the work.
- KT research in terms of capacity building should be explored. More focus on KT esp. in LMICs.
- More focus is needed on understanding the involvement of national/local health systems in KT research.
- The research agenda should contextualize every research area/question/KT strategy.
- It should also include research focusing on the implementation strategies for KT research.
- Question on barriers to include all kinds of stakeholders (marginalized groups) in KT research.
- The role of academic institutions needs to be clarified given that the majority is not working on KT which has implications for capacity building.

**Breakout Room 4: Research on KT/EIP methods, standards, and measurements**

**BR4.A. Key findings related to Tab 1 (KT research methods)**

- “Conduct interdisciplinary and mixed-methods KT research” seems too broad a research area and should be reworded. There is a need for cross-disciplinary research, but this will require a balance, i.e., every discipline will bring a unique perspective but need to find commonalities.
- There is a need for more focus on perspectives of KT research users – there is too much focus on research perspectives.
- Additional research is needed on methods that incorporate equity considerations into EIP, e.g., minority/indigenous group-led KT processes – participants highlighted this research area as critical.

**BR4.B. Key findings related to Tab 2 (Approaches, AI and technology, Field standardization, indicators, M&E methods, and Tools)**

- “Use of technology to support KT” is too vague, especially since there already is another research area on AI. Toolkits may be examples of technology that do not fall under AI.
- There is not enough comparative analysis of KT approaches, particularly in terms of what is most cost-effective. What methods could be used to drive and assess this.
- Additional research areas discussed and proposed:
  - Looking at knowledge more broadly and how overall access to evidence leads to improvements in policies.
  - Consistent measurements, speaking the same language, and coming up with good metrics and frameworks.
  - Improve KT standards (‘field-building’) more systemically (e.g., reporting standards for research/journal requirements, common set of indicators, M&E frameworks) to better understand what is being done.

**Breakout Room 5: Research on Theories/Frameworks + Interventions III**

**BR5.A. Key findings**

- AI-related KT frameworks are an important topic. There are not many publications yet.
- Research needs to consider capacity-building efforts, including how to make KT an integral part of scientific processes and structures.
- Indigenous knowledge and the knowledge held by marginalized groups needs to be recognized more (cf. research by scholars of color, e.g., in Australia).
- In implementation science, there is a strong push not to come up with more frameworks, but to use the existing ones.
- Barriers to scientific voices being heard remain, particularly in LMICs. Specifically, barriers to accessing research (e.g., journal pay walls, language barriers) and how these can be addressed.
- There is a need to assess the uptake of evidence in EIP to understand how evidence is being used and disseminated in the field.
- There are two layers that need to be distinguished clearer: the strategies of KT and their effectiveness; and the uptake of the strategies if they are effective.
- There is a need to consider political cycles so that institutional efforts can be incorporated towards political institutions.

## **Supplementary File 4a. First Delphi Survey. Ranking of the research areas (n=50)**

| **ID** | **Research area** | **Framework domain** | **Scenario a**  Overall scaled score (≥ 70%) | **Scenario b**  Overall scaled score (≥ 75%) | **Scenario c**  Overall scaled score (≥ 80%) |
| --- | --- | --- | --- | --- | --- |
| 1 | Research on interventions for improving the communication of research findings | 1 - Interventions | 0.836 | 0.836 | 0.836 |
| 4 | Research on tools to measure the impacts of KT/EIP products | 1 - Interventions | 0.778 | 0.778 | 0.778 |
| 23 | Research on adapting, and assessing scale-up and of capacity-strengthening approaches | 1 - Interventions | 0.767 | 0.767 | 0.767 |
| 2 | Identifying and assessing KT/EIP interventions directed to improve trust in science and willingness to use it | 1 - Interventions | 0.765 | 0.765 | 0.765 |
| 12 | Identifying, developing, and assessing evidence-to-policy engagement forums and proposing best practices | 1 - Interventions | 0.755 | 0.755 | 0.755 |
| 27 | Identifying, developing, and assessing strategies and approaches to institutionalize evidence production and use from a KT/EIP perspective | 1 - Interventions | 0.752 | 0.752 | 0.752 |
| 13 | Identifying, developing, and assessing strategies for evidence uptake and scaling-up of KT/EIP approaches | 1 - Interventions | 0.743 | 0.743 | 0.743 |
| 17 | Understanding the relationship between evidence generators, intermediaries, users, and citizens | 1 - Interventions | 0.738 | 0.738 | 0.738 |
| 8 | Identifying and assessing interventions for selecting and using the right type of evidence | 1 - Interventions | 0.737 | 0.737 | 0.737 |
| 30 | Research on integrating ethical considerations and implications into KT/EIP approaches | 1 - Interventions | 0.727 | 0.727 | 0.727 |
| 29 | Research on improving cross-sector collaboration and the scaling-up of cross-sectoral KT/EIP approaches | 1 - Interventions | 0.716 | 0.716 | 0.716 |
| 20 | Understanding engagement processes of decision-makers in evidence uptake | 1 - Interventions | 0.703 | 0.703 | 0.703 |
| 7 | Identifying and assessing the impacts of Policy Advocates and Knowledge Brokers | 1 - Interventions | 0.696 | 0.696 | 0.696 |
| 15 | Assessing the impact of implementing policies derived from KT/EIP, including systems approaches | 1 - Interventions | 0.664 | 0.664 | 0.664 |
| 25 | Research on adapting, and assessing approaches for sustaining KT/EIP initiatives | 1 - Interventions | 0.653 | 0.653 | 0.653 |
| 45 | Research on integrating gender equality lens into KT/EIP approaches | 2 - Barriers | 0.826 | 0.826 | 0.826 |
| 47 | Research on engaging individuals with lived experiences in knowledge generation and translation | 2 - Barriers | 0.797 | 0.797 | 0.797 |
| 18 | Research on factors that affect the relationship between evidence generators, intermediaries, users, and citizens, including co-creation and co-production | 2 - Barriers | 0.791 | 0.791 | 0.791 |
| 43 | Research on factors related to the decolonization of knowledge, research methods, and measures | 2 - Barriers | 0.786 | 0.786 | 0.786 |
| 32 | Understanding the integration and harmonization of local and global knowledge in the KT/EIP process, and improving evidence contextualization | 2 - Barriers | 0.767 | 0.767 | 0.767 |
| 14 | Research on factors related to the evidence uptake and scaling-up of KT/EIP approaches (e.g., characteristics, incentives, cultural factors, and power dynamics) | 2 - Barriers | 0.766 | 0.766 | 0.766 |
| 48 | Research on factors addressing structural disparities in KT/EIP approaches | 2 - Barriers | 0.765 | 0.765 | 0.765 |
| 46 | Research on integrating critical race theory, power dynamics and equity considerations into KT/EIP approaches | 2 - Barriers | 0.765 | 0.765 | 0.765 |
| 49 | Understanding and developing approaches for policy learning and transfer of successful KT/EIP experiences between countries and sectors | 2 - Barriers | 0.763 | 0.763 | 0.763 |
| 50 | Understanding, developing, and assessing translation of evidence during public health emergencies | 2 - Barriers | 0.759 | 0.759 | 0.759 |
| 51 | Understanding contextual factors and their role in research uptake and the implementation of KT/EIP approaches at different levels | 2 - Barriers | 0.749 | 0.749 | 0.749 |
| 21 | Research on factors related to the engagement of decision-makers in evidence uptake | 2 - Barriers | 0.719 | 0.719 | 0.719 |
| 9 | Research on factors related to the selection and correct use of different types of evidence | 2 - Barriers | 0.697 | 0.697 | 0.697 |
| 26 | Research on factors related to leveraging financial resources to sustain KT/EIP initiatives | 2 - Barriers | 0.674 | 0.674 | 0.674 |
| 24 | Research on factors m the scaling-up and strengthening of KT/EIP approaches | 2 - Barriers | 0.662 | 0.662 | 0.662 |
| 31 | Understanding the dynamics of evidence needs and policy windows | 2 - Barriers | 0.635 | 0.635 | 0.635 |
| 35 | Research on innovative and evolving technologies that support KT/EIP such as Artificial Intelligence (AI) | 3 - Methods | 0.754 | 0.754 | 0.754 |
| 3 | Research on methods for improving trust in science and willingness to use it | 3 - Methods | 0.741 | 0.741 | 0.741 |
| 33 | Research on methods of integration and harmonization of local and global knowledge in the KT/EIP process, and for improving evidence contextualization | 3 - Methods | 0.741 | 0.741 | 0.741 |
| 10 | Research on methods to select, assess and use different types of evidence | 3 - Methods | 0.734 | 0.734 | 0.734 |
| 37 | Research on developing typologies, metrics, and standardizations for KT/EIP approaches | 3 - Methods | 0.729 | 0.729 | 0.729 |
| 22 | Research on methods to strengthen the engagement of decision-makers in evidence uptake | 3 - Methods | 0.718 | 0.718 | 0.718 |
| 34 | Research on approaches to improve knowledge translation for climate change | 3 - Methods | 0.704 | 0.704 | 0.704 |
| 5 | Identifying and assessing the cost-effectiveness of different KT/EIP approaches | 3 - Methods | 0.694 | 0.694 | 0.694 |
| 38 | Research on methods for intersecting KT/EIP with basic science, clinical practice, public health, political science, and science diplomacy | 3 - Methods | 0.689 | 0.689 | 0.689 |
| 41 | Understanding and proposing the right theories and frameworks of KT/EIP for different contexts | 4 - Theories | 0.745 | 0.745 | 0.745 |
| 42 | Research on theories and frameworks for decolonizing knowledge, research methods, and measures | 4 - Theories | 0.735 | 0.735 | 0.735 |
| 36 | Research on theories and frameworks for the incorporation of innovative and evolving technologies that support knowledge translation such as Artificial Intelligence (AI) | 4 - Theories | 0.719 | 0.719 | 0.719 |
| 19 | Research on theories and frameworks to strengthen the relationship between evidence generators, intermediaries, users, and citizens | 4 - Theories | 0.701 | 0.701 | 0.701 |
| 44 | Understanding the goal of evidence use and how success can be defined | 4 - Theories | 0.684 | 0.684 | 0.684 |
| 28 | Research on theories and frameworks about the institutionalization of KT/EIP | 4 - Theories | 0.678 | 0.678 | 0.678 |
| 6 | Identifying and assessing the implications and measurable impact of KT/EIP theories | 4 - Theories | 0.644 | 0.644 | 0.644 |
| 999 | Research on demand-led, sustainable, and full-spectrum theories, models, frameworks, and taxonomies of interventions and outcomes for effective KT/EIP | 4 - Theories | 0.642 | 0.642 | 0.642 |
| 40 | Understanding how concepts of “well-being” in social care shape evidence-informed policy decisions | 4 - Theories | 0.614 | 0.614 | 0.614 |
| 39 | Research on theories and frameworks about the intersections of KT/EIP with basic science, clinical practice, public health, political science, and science diplomacy | 4 - Theories | 0.606 | 0.606 | 0.606 |
|  |  |  |  |  |  |
|  |  | **How many were prioritized in Round 1** | 35 | 17 | 2 |
|  | **How many were excluded in Round 1** | 0 | 0 | 0 |
|  | **How many go to round 2** | 15 | 33 | 48 |
|  | **Number of prioritized that belong to domain interventions** | 12 | 6 | 1 |
|  | **Number of prioritized that belong to domain barriers** | 12 | 10 | 1 |
|  | **Number of prioritized that belong to domain methods** | 7 | 1 | 0 |
|  | **Number of prioritized that belong to domain theories** | 4 | 0 | 0 |

**Details**

On a scale of 0 to 10, research area scores ranged from approximately 4 to 7.5. The median score was 6 (interquartile range: 5.4-6.4), and the average was 5.8 (standard deviation: 0.8). Each research area received scores from at least 66 participants.

For final ranking and presentation, all scores were normalized to a scale of 0 to 1, representing each area’s overall score as a percentage of the maximum obtainable average intermediate score (which was three). As an example, a research area with a mean intermediate score of 2.508 was presented as 83.6% of 3, or 0.836.

Three prioritization scenarios were evaluated: (a) prioritizing all research areas with overall scores ≥ 0.70, (b) prioritizing those with scores ≥ 0.75, and (c) prioritizing those with scores ≥ 0.80. The decision was made to adopt scenario (a), as it yielded a balanced prioritization of research areas across the framework domains (i.e., interventions, barriers and facilitators, methods and theories). Under this scenario, 35 research areas exceeded the 0.7 threshold in this Delphi round, comprising 12 intervention-related areas (80% of all areas in that domain), 12 barrier- and facilitator-related areas (75%), 7 method-related areas (78%), and 4 theory-related areas (40%). Subsequently, the methods and theories domains were merged, resulting in 11 prioritized research areas within the combined domain (58% of all areas in that domain).

This process led to the prioritization of 34 research areas meeting the pre-defined minimum threshold. Furthermore, proposed additional research areas were analyzed, and additional feedback was collected for consideration in subsequent rounds. Following Delphi Round 1, the list of research areas was prepared for updating through the application of thresholds to remove low-scoring areas or by retaining only the highest-scoring areas for continued discussion and refinement.

## **Supplementary File 4b. Expanded definitions of the three criteria for scoring research areas (Delphi Round 1)**

**Impact** – What kind of potential impact can this research have on the field? Research in this area will enhance knowledge translation and evidence-informed policy-making, leading to positive impacts on health and other social sector outcomes. Knowledge translation researchers, practitioners, commissioners, policy-makers, and funders will find outcomes of research in this area important and interesting.

**Inclusivity** – How likely is it that this research will promote inclusivity and equity? Research in this area will promote equal opportunities and resources for people who might otherwise not get them, such as historically underrepresented groups, marginalized communities, or actors in low-income settings. It will elevate diverse perspectives, experiences, and voices throughout the evidence-to-policy process.

**Feasibility** – How likely is it that the research is carried out? Think of possible constraints such as scientific limitations (availability of data, technical expertise), logistical arrangements (financial resources, timeframe) or other obstacles. For example, a desk-based literature review would be relatively easy to do (High feasibility) with existing resources and research capacity; instead, a multi-centre, multi-arm randomized trial would require much greater research expertise, time and resources to complete (Low feasibility). 

## **Supplementary File 5. Second Delphi Round – Final order of 34 research areas according to overall results and cross-group comparisons**

| **Order** | **Research area** | **Classification of priority (before weighting)** | **Total token allocated** | **How many groups classified as A** | **How many groups classified as B** | **How many groups classified as C** | **How many groups classified as 0** |
| --- | --- | --- | --- | --- | --- | --- | --- |
| **1** | I-Identify, develop, and assess strategies and approaches to institutionalize evidence production, translation, and use | A | 98 | 5 | 1 | 0 | 1 |
| **2** | I-Evaluate the impacts of KT/EIP products and interventions. | A | 95 | 6 | 0 | 0 | 1 |
| **3** | I-Explore engagement strategies for evidence uptake by decision-makers | A | 86 | 3 | 1 | 1 | 2 |
| **4** | BFO-Examine contextual factors and their role in research uptake, implementation, and scaling-up of KT/EIP approaches at different levels | A | 85 | 6 | 0 | 1 | 0 |
| **5** | I-Understand, develop, and assess strategies for translating evidence during public health emergencies | A | 84 | 5 | 2 | 0 | 0 |
| **6** | BFO-Analyze factors determining the engagement of decision-makers in evidence uptake | A | 83 | 3 | 2 | 2 | 0 |
| **7** | BFO-Integrate a Diversity, Equity, and Inclusion (DEI) lens into KT/EIP activities | A | 82 | 3 | 1 | 1 | 2 |
| **8** | MSMTF-Explore innovative and evolving technologies that support KT/EIP, such as Artificial Intelligence (AI) | A | 78 | 2 | 3 | 0 | 2 |
| **9** | BFO-Understand and develop approaches for policy learning and transfer of successful KT/EIP experiences between countries and sectors | A | 74 | 4 | 1 | 1 | 1 |
| **10** | BFO-Engage individuals with lived experiences in knowledge generation and translation | A | 74 | 2 | 3 | 0 | 2 |
| **11** | I-Understand engagement processes between evidence generators, intermediaries, and users, including co-creation and co-production | B | 73 | 3 | 1 | 0 | 3 |
| **12** | BFO-Investigate factors that affect the relationship between evidence generators, intermediaries, users, and citizens, including co-creation and co-production | A | 72 | 3 | 2 | 2 | 0 |
| **13** | MSMTF-Investigate methods, theories, and frameworks for decolonizing knowledge, research methods, and measures | B | 70 | 1 | 3 | 2 | 1 |
| **14** | I-Assess capacity-strengthening interventions, including their adaptation and scale-up | B | 70 | 2 | 2 | 1 | 2 |
| **15** | I-Identify, develop, and assess strategies for scaling-up KT/EIP interventions | B | 69 | 2 | 0 | 4 | 1 |
| **16** | I-Identify, develop, and assess evidence-to-policy engagement mechanisms and best practices | C | 67 | 1 | 1 | 3 | 2 |
| **17** | I-Improve the communication of research findings. | C | 66 | 0 | 1 | 3 | 3 |
| **18** | MSMTF-Explore methods for intersecting KT/EIP with basic science, clinical practice, public health, political science, and science diplomacy | C | 65 | 1 | 2 | 2 | 2 |
| **19** | I-Identify and assess KT/EIP interventions directed at improving trust in science and willingness to use evidence | 0 | 62 | 1 | 2 | 0 | 4 |
| **20** | BFO-Investigate economic and financial factors related to scaling-up, strengthening, and sustaining KT/EIP approaches | 0 | 61 | 1 | 1 | 0 | 5 |
| **21** | MSMTF-Explore methods for integrating and harmonizing local and global knowledge in the KT/EIP process, and for improving evidence contextualization | C | 59 | 1 | 3 | 0 | 3 |
| **22** | MSMTF-Develop typologies, metrics, and standardizations for KT/EIP approaches | C | 59 | 1 | 3 | 0 | 3 |
| **23** | MSMTF-Develop methods for improving trust in science and willingness to use it | 0 | 59 | 1 | 0 | 2 | 4 |
| **24** | I-Identify, develop, and assess interventions for selecting and using the right type of evidence, including living evidence syntheses | 0 | 54 | 0 | 0 | 1 | 6 |
| **25** | MSMTF-Explore theories and frameworks to strengthen the relationship between evidence generators, intermediaries, users, and citizens | 0 | 53 | 2 | 1 | 0 | 4 |
| **26** | MSMTF-Explore methods to select, assess, and use different types of evidence | 0 | 52 | 0 | 1 | 0 | 6 |
| **27** | MSMTF-Examine approaches to improve KT/EIP in complex policy environments, e.g., climate change | 0 | 50 | 0 | 1 | 2 | 4 |
| **28** | MSMTF-Incorporate innovative and evolving technologies such as Artificial Intelligence (AI) into KT/EIP theories and frameworks | 0 | 48 | 1 | 0 | 1 | 5 |
| **29** | MSMTF-Understand the goal of evidence use, how evidence use develops over time, and how success can be defined | 0 | 45 | 2 | 0 | 0 | 5 |
| **30** | BFO-Examine factors addressing structural disparities in KT/EIP approaches | 0 | 43 | 2 | 0 | 0 | 5 |
| **31** | MSMTF-Understand and propose appropriate KT/EIP theories and frameworks for different contexts | 0 | 42 | 0 | 2 | 0 | 5 |
| **32** | I-Integrate ethical considerations and implications into KT/EIP interventions | 0 | 40 | 1 | 0 | 0 | 6 |
| **33** | I-Examine strategies for improving cross-sector collaboration | 0 | 37 | 0 | 0 | 2 | 5 |
| **34** | MSMTF-Develop and continuously improve criteria and processes for research priority-setting in KT/EIP | 0 | 29 | 0 | 1 | 0 | 6 |

**Details:** areas were upgraded or downgraded based on their frequency of appearance in each group across subgroups. For instance, any research area was re-classified as A when it had been classified A in four or more sub-groups, or had been classified A or B in five or more sub-groups. This process led to one area being promoted from B to A, two C areas being downgraded and excluded, and two previously excluded areas being reinstated as C. Following this refined classification, the final distribution included 11 research areas in Group A, 4 in Group B, and 5 in Group C, with 14 areas excluded (Group 0). In addition, two thematically overlapping research areas were merged into one: “Explore engagement strategies for evidence uptake by decision-makers” and “Understand engagement processes between evidence generators, intermediaries, and users, including co-creation and co-production” were combined into a single area titled “Explore engagement processes between evidence generators, intermediaries, and users, including co-creation and co-production, for evidence uptake by decision-makers.” This consolidation resulted in a final pool of 19 prioritized research areas. As the concluding step of this Delphi round, two scenarios were proposed for the final research agenda: one comprising only the 11 top-ranked areas in Group A, and another more comprehensive and overall, more balanced option including all 19 areas from Groups A, B, and C. Both scenarios were carried forward for deliberation and validation in the final expert consultation.

**Summary: Number of research areas per domain after each prioritization activity**

| Prioritization activity      Research  domains | After the scoping phase (input for the first consultation) | After the first consultation/input for the first Delphi survey | After the first Delphi survey/input for the second Delphi survey | After the second Delphi survey/input for the final consultation*** |
| --- | --- | --- | --- | --- |
| Research on KT/EIP interventions | 58 | 15 | 13 | 4/8 |
| Research on barriers, facilitators, and opportunities for KT/EIP | 15 | 16 | 8 | 6/6 |
| Research on methods, standards, measurements, theories and frameworks for KT/EIP* | 42 | 19 | 13 | 1/5 |
| Cross-cutting: Diversity, Equity, and Inclusion (DEI)** | 5 | n/a | n/a | n/a |
| Total | **120** | **50** | **34** | **11/19** |

* In the first consultation and first Delphi survey, this domain was initially divided into “Research on methods, standards, and measurements” and “Research on theories and frameworks.” These were later merged due to thematic overlap and to ensure a more balanced distribution of research areas across domains.

** This cross-cutting domain was integrated into the remaining domains after the first consultation.

*** After the 2nd Delphi survey, two scenarios were carried forward for deliberation and validation during the final expert consultation, one with 11 research areas, and one, more comprehensive option with 19.

## **Supplementary File 6. Demographic Characteristics of Participants in the Two Delphi Surveys and the two Expert Consultations**

|  | Delphi 1  (n=83) | Delphi 2  (n=84) | Consultation 1  (n=112) | Consultation 2  (n=69) | TOTAL*** (n=131) |
| --- | --- | --- | --- | --- | --- |
| Gender | | | | |  |
| Female | 57 (68.7%) | 57 (67.9%) | 81 (72.3%) | 44 (63.8%) | 92 (70.2%) |
| Male | 26 (31.3%) | 27 (32.1%) | 31 (27.7%) | 24 (34.8%) | 39 (29.8%) |
| Geography* | | | | |  |
| AFRO | 13 (15.7%) | 15 (17.9%) | 17 (15.2%) | 12 (17.4%) | 21 (16.0%) |
| AMRO | 31 (37.3%) | 29 (34.5%) | 41 (36.6%) | 18 (26.1%) | 46 (35.1%) |
| EMRO | 3 (3.6%) | 4 (4.8%) | 10 (8.9%) | 5 (7.2%) | 10 (7.6%) |
| EURO | 13 (15.7%) | 13 (15.5%) | 24 (21.4%) | 16 (23.2%) | 25 (19.1%) |
| SEARO | 7 (8.4%) | 7 (8.3%) | 7 (6.3%) | 6 (8.7%) | 9 (6.9%) |
| WPRO | 16 (19.3%) | 16 (19.0%) | 13 (11.6%) | 12 (17.4%) | 20 (15.3%) |
| Country income level** | | | | |  |
| HIC | 46 (55.4%) | 47 (56.0%) | 67 (59.8%) | 34 (49.3%) | 77 (58.8%) |
| UMIC | 16 (19.3%) | 13 (15.5%) | 18 (16.1%) | 15 (21.7%) | 22 (16.8%) |
| LMIC | 15 (18.1%) | 17 (20.2%) | 18 (16.1%) | 16 (23.2%) | 23 (17.6%) |
| LIC | 6 (7.2%) | 7 (8.3%) | 9 (8.0%) | 4 (5.8%) | 9 (6.9%) |

*AFRO=WHO African Region; AMRO=WHO Region of the Americas; EMRO=WHO Eastern Mediterranean Region; EURO=WHO European Region; SEARO=WHO South-East Asia Region; WPRO=WHO Western Pacific Region.

** HIC=High-income country; UMIC=Upper-middle income country; LMIC=Lower-middle income country; LIC=Low-income country.

*** A total of 131 individuals participated in at least one consultation *or* Delphi survey.
